# Supplementary material
Source: Royal Society of Chemistry journal article supplement (doi:10.1039/d6cp00667a)
Supplement: d6cp00667a2.pdf [file d6cp00667a2.pdf]

Electronic Supporting Information file for:

## **Y@Cu<sub>15</sub>. A Novel Spherical Aromatic 18-*ce* Bare Superatomic Molecular Cluster**

Peter L. Rodríguez-Kessler,\*<sup>a</sup> Alvaro Muñoz-Castro\*<sup>b</sup>

<sup>a</sup>Centro de Investigaciones en Óptica A.C., Loma del Bosque 115, Col. Lomas del Campestre, León, Guanajuato, 37150, Mexico.

<sup>b</sup>Facultad de Ingeniería, Universidad San Sebastián, Bellavista 7, Santiago, 8420524, Chile.

### **Content**

Figure S1. Superatomic orbitals for the W@Au<sub>12</sub> cluster, denoting a 1S<sup>2</sup>1P<sup>6</sup>1D<sup>10</sup> electronic shells structure. Page S2

Table S1. Energy decomposition analysis for the Y<sup>3+</sup>-Cu<sub>15</sub><sup>3-</sup> and W<sup>3+</sup>-Au<sub>12</sub><sup>3-</sup> interaction. Values in kcal/mol. Page S2

Table S2. Optimized coordinates for the studied species in a MultiXYZ format. Page S3

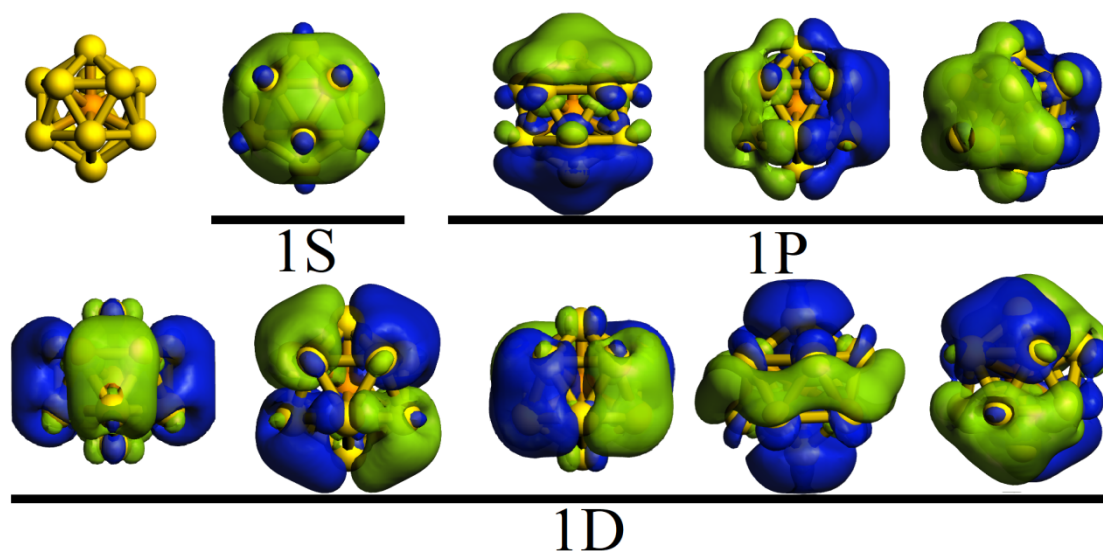

Figure S1. Superatomic orbitals for the  $W@Au_{12}$  cluster, denoting a  $1S^21P^61D^{10}$  electronic shells structure.

Table S1. Energy decomposition analysis for the  $Y^{3+}-Cu_{15}^{3-}$  and  $W^{3+}-Au_{12}^{3-}$  interaction. Values in kcal/mol.

|                            | $Y@Cu_{15}$ |                    | $W@Au_{12}$ |                    |
|----------------------------|-------------|--------------------|-------------|--------------------|
| $\Delta E_{\text{Pauli}}$  | 405.9       |                    | 544.0       |                    |
| $\Delta E_{\text{elstat}}$ | -864.9      | 55.7% <sup>a</sup> | -889.4      | 43.7% <sup>a</sup> |
| $\Delta E_{\text{orb}}$    | -679.2      | 43.7% <sup>a</sup> | -1135.0     | 55.8% <sup>a</sup> |
| $\Delta E_{\text{disp}}$   | -9.0        | 0.6% <sup>a</sup>  | -9.1        | 0.4% <sup>a</sup>  |
|                            |             |                    |             |                    |
| $\Delta E_{\text{int}}$    | -1147.3     |                    | -1489.5     |                    |
|                            |             |                    |             |                    |
| $\Delta\rho_1$             | -104.7      | 15.4% <sup>b</sup> | -149.8      | 13.2% <sup>b</sup> |
| $\Delta\rho_1$             | -100.5      | 14.8% <sup>b</sup> | -131.6      | 11.6% <sup>b</sup> |
| $\Delta\rho_3$             | -98.4       | 14.5% <sup>b</sup> | -104.0      | 9.2% <sup>b</sup>  |
| $\Delta\rho_4$             | -96.0       | 14.1% <sup>b</sup> | -97.1       | 8.6% <sup>b</sup>  |
| $\Delta\rho_5$             | -91.5       | 13.5% <sup>b</sup> | -91.7       | 8.1% <sup>b</sup>  |
| $\Delta\rho_6$             | -16.4       | 2.4% <sup>b</sup>  |             |                    |

<sup>a</sup>Percentage contribution to stabilizing terms. <sup>b</sup>Percentage contribution to  $\Delta E_{\text{orb}}$  term.

Table S2. Optimized coordinates for the studied species in a MultiXYZ format. Values in Angstrom (Å).

|        |              |              |              |
|--------|--------------|--------------|--------------|
| 16     |              |              |              |
| Y@Cu15 |              |              |              |
| Cu     | 2.094900162  | 1.326400100  | 1.018164211  |
| Cu     | 0.000000000  | 1.215400092  | 2.502864325  |
| Cu     | -2.094900162 | 1.326400100  | 1.018164211  |
| Cu     | 0.000000000  | 2.720800207  | 0.599364181  |
| Cu     | -2.094900162 | -1.326400100 | 1.018164211  |
| Cu     | 2.094900162  | -1.326400100 | 1.018164211  |
| Cu     | -1.229300096 | 1.990700151  | -1.410335973 |
| Cu     | 1.229300096  | 1.990700151  | -1.410335973 |
| Cu     | 0.000000000  | -1.215400092 | 2.502864325  |
| Cu     | 2.527500193  | 0.000000000  | -1.074335947 |
| Cu     | 0.000000000  | -2.720800207 | 0.599364181  |
| Cu     | -2.527500193 | 0.000000000  | -1.074335947 |
| Cu     | -1.229300096 | -1.990700151 | -1.410335973 |
| Cu     | 0.000000000  | 0.000000000  | -2.559536059 |
| Cu     | 1.229300096  | -1.990700151 | -1.410335973 |
| Y      | 0.000000000  | 0.000000000  | 0.053864139  |
| 13     |              |              |              |
| W@Au12 |              |              |              |
| W      | 0.000000000  | 0.000000000  | 0.000000000  |
| Au     | 0.000000000  | 2.452382530  | 1.223394298  |
| Au     | -2.332354546 | -0.757827859 | -1.223394298 |
| Au     | 2.332354546  | 0.757827859  | 1.223394298  |
| Au     | 0.000000000  | -2.452382530 | -1.223394298 |
| Au     | -1.441474593 | 1.984019388  | -1.223394298 |
| Au     | 2.332354546  | -0.757827859 | -1.223394298 |
| Au     | -2.332354546 | 0.757827859  | 1.223394298  |
| Au     | 1.441474593  | -1.984019388 | 1.223394298  |
| Au     | 1.441474593  | 1.984019388  | -1.223394298 |
| Au     | 0.000000000  | 0.000000000  | 2.739801448  |
| Au     | 0.000000000  | 0.000000000  | -2.739801448 |
| Au     | -1.441474593 | -1.984019388 | 1.223394298  |
